# Supplementary material for: Chitosan Film as a Replacement for Conventional Sulphur Dioxide Treatment of White Wines: A 1H NMR Metabolomic Study
Source: MDPI journal article supplement (doi:10.3390/foods11213428), 2022-10-29

## SUPPLEMENTARY INFORMATION

### **Chitosan Film as a Replacement for Conventional Sulphur Dioxide Treatment of White Wines: A <sup>1</sup>H NMR Metabolomic Study**

Joao A. Rodrigues <sup>1,†,\*</sup>, Cláudia Nunes <sup>1,†</sup>, Manuel A. Coimbra <sup>2</sup>, Brian J. Goodfellow <sup>1</sup>  
and Ana M. Gil <sup>1</sup>

\* Correspondence: joao.rodrigues@ua.pt; Tel.: +351-234370707

† These authors contributed equally to this work.

<sup>1</sup> CICECO—Aveiro Institute of Materials, Department of Chemistry, University of Aveiro, Campus Universitário de Santiago, 3810-193 Aveiro, Portugal

<sup>2</sup> LAQV/REQUIMTE, Department of Chemistry, University of Aveiro, 3810-193 Aveiro, Portugal

**Table S1.** List of compounds and corresponding spin systems identified in 500 MHz  $^1\text{H}$  NMR spectra of the white wines under study. The peaks used for integration are shown in bold and underlined. s, singlet; d, doublet; dd, double doublet; t, triplet; q, quartet; m, multiplet. <sup>1</sup> FooDB compounds ID code based on [www.foodb.ca](http://www.foodb.ca) (accessed in 01-04-2022). <sup>2</sup> HMDB metabolites code based on [25]. <sup>3</sup> tentative assignment based on [19].

**Table S2.** Summary of results obtained by one- and two-dimensional statistical total correlation spectroscopy analysis (1D and 2D STOCSY) [30]. Only metabolites or unassigned resonances with correlations  $|r| \geq 0.9$  and  $p < 0.001$  were considered. <sup>a</sup> tentative spin system 1 (U13, U15 and U19); <sup>b</sup> tentative spin system 2 (U23, U27 and U33); <sup>c</sup> tentative spin system 3 (U1, U41 and U43). Abbreviations: s, singlet; d, doublet; *Ui*: unassigned resonance *i*. <sup>#</sup> Acetate results are possibly affected by residual amounts present in the films (use of acetic acid the films preparation). The numbers in brackets correspond to inter-peak correlations identified in Figure S1. For unassigned resonances U7, U13 and U23, inter-peak correlations were identified by 1D STOCSY (not shown).

**Figure S1.** Two dimensional STOCSY contour plots obtained for (a) whole NMR spectra of all wines and expansions of (b) 3.0 - 6.0 ppm and (c) 0.5 - 3.8 ppm regions. Positive and negative correlations are represented in red and in blue, respectively. Only resonances correlations with  $|r| \geq 0.90$  and  $p < 0.001$  were considered. Each peak in the NMR spectra will appear on the diagonal of the correlation matrix, with an autocorrelation value of 1. The inter-peak correlations above the threshold value appear off the diagonal. Some inter-peak correlations are identified by numbers and detailed in Table S2.

**Figure S2.** Boxplots of varying unassigned resonances in white wines in the following conditions: untreated (Unt), treated with 40 mg/L of  $\text{SO}_2$ , and treated with 25  $\text{cm}^2$  and 100  $\text{cm}^2$  Ch-Ge films, Chit25 and Chit100, respectively. *Ui*: unassigned resonance *i*. Based on STOCSY results (Figure S1 and Table S2): <sup>a</sup> tentative spin system 1 (unassigned U13, U15 and U19); <sup>b</sup> tentative spin system 2 (unassigned U23, U27 and U33, probably a precursor/byproduct of ferulate); and <sup>c</sup> tentative spin system 3 (unassigned U1, U41 and U43, probably corresponding to a sugar) are suggested.

**Table S1.** List of compounds and corresponding spin systems identified in 500 MHz  $^1\text{H}$  NMR spectra of the white wines under study. The peaks used for integration are shown in bold and underlined. s, singlet; d, doublet; dd, double doublet; t, triplet; q, quartet; m, multiplet. <sup>1</sup> FooDB compounds ID code based on www.foodb.ca (accessed in 01-04-2022). <sup>2</sup> HMDB metabolites code based on [25]. <sup>3</sup> tentative assignment based on [19].

| Family of compounds | Compound             | $\delta$ $^1\text{H}$ in ppm (multiplicity, assignment)                                                                                              | FooDB ID <sup>1</sup> /<br>HMDB ID <sup>2</sup> |
|---------------------|----------------------|------------------------------------------------------------------------------------------------------------------------------------------------------|-------------------------------------------------|
| Organic acids       | Acetate              | <u><b>2.07</b></u> (s, $\beta$ CH <sub>3</sub> )                                                                                                     | FDB008299/<br>HMDB00042                         |
|                     | Citrate              | 2.77 (d, $\alpha$ , $\gamma$ CH); <u><b>2.93</b></u> (d, $\alpha'$ , $\gamma'$ CH)                                                                   | FDB012586/<br>HMDB0000094                       |
|                     | Ferulate             | 3.94 (s, CH <sub>3</sub> ); 6.43 (d, CH); <u><b>6.94</b></u> (d, CH);<br>7.13 (dd, CH); 7.68 (d, CH)                                                 | FDB012801/<br>HMDB0000954                       |
|                     | Formate              | <u><b>8.27</b></u> (s, HCOOH)                                                                                                                        | FDB012804/<br>HMDB0000142                       |
|                     | Fumarate             | <u><b>6.74</b></u> (s, $\beta$ CH)                                                                                                                   | FDB003291/<br>HMDB0000134                       |
|                     | Lactate              | <u><b>1.41</b></u> (d, $\beta$ CH <sub>3</sub> ); 4.32 (q, $\alpha$ CH)                                                                              | FDB003292/<br>HMDB0000190                       |
|                     | Malate               | <u><b>2.80</b></u> (dd, $\beta'$ CH); 2.86 (dd, $\beta$ CH); 4.50 (s, $\alpha$ CH)                                                                   | FDB008114/<br>HMDB0000156                       |
|                     | Pyruvate             | <u><b>2.35</b></u> (s, $\beta$ CH <sub>3</sub> )                                                                                                     | FDB008293/<br>HMDB0000243                       |
|                     | Succinate            | <u><b>2.65</b></u> (s, $\alpha$ , $\beta$ CH <sub>2</sub> )                                                                                          | FDB001931/<br>HMDB0000254                       |
|                     | Tartarate            | <u><b>4.58</b></u> (s, C <sub>2</sub> H, C <sub>3</sub> H)                                                                                           | FDB001112/<br>HMDB0000956                       |
| Alcohols            | 1-propanol           | <b>0.88</b> (t, CH <sub>3</sub> ); 1.53 (m, CH <sub>2</sub> ); 3.54 (t, CH <sub>2</sub> OH)                                                          | FDB008280/<br>HMDB0000820                       |
|                     | Isobutanol           | <b>0.86</b> (d, CH <sub>3</sub> ); 1.33 (m, CH); 3.36 (d, CH <sub>2</sub> OH)                                                                        | FDB003274/<br>HMDB0006006                       |
|                     | Isopentanol          | <b>0.87</b> (d, CH <sub>3</sub> ); 1.42 (q, CH); 1.65 (m, CH <sub>2</sub> )                                                                          | FDB008131/<br>HMDB0006007                       |
|                     | 2,3-butanediol       | <u><b>1.12</b></u> (d, CH <sub>3</sub> )                                                                                                             | FDB011934/<br>HMDB0003156                       |
|                     | Ethanol              | <u><b>1.17</b></u> (t, CH <sub>3</sub> ); 3.65 (q, CH <sub>2</sub> OH)                                                                               | FDB000753/<br>HMDB0000108                       |
|                     | Glycerol             | <u><b>3.56</b></u> (dd, C <sub>1</sub> H <sub>2</sub> ); 3.62 (dd, C <sub>2</sub> H <sub>2</sub> ); 3.76 (m, C <sub>3</sub> H <sub>2</sub> )         | FDB000756/<br>HMDB0000131                       |
|                     | Methanol             | <u><b>3.34</b></u> (s, CH <sub>3</sub> )                                                                                                             | FDB008124/<br>HMDB0001875                       |
|                     | <i>myo</i> -inositol | <u><b>3.25</b></u> (t, CH); 4.04 (t, CH)                                                                                                             | FDB010547/<br>HMDB0000211                       |
|                     | Phenylethanol        | 7.29 (m, C <sub>2</sub> H/ C <sub>6</sub> H ring); <u><b>7.37</b></u> (m, C <sub>3</sub> H/ C <sub>5</sub> H ring)                                   | FDB010561/<br>HMDB0032619                       |
|                     | Tyrosol              | <u><b>6.84</b></u> (d, C <sub>3</sub> H/ C <sub>5</sub> H ring); 7.17 (d, C <sub>2</sub> H/ C <sub>6</sub> H ring)                                   | FDB031233/<br>HMDB0004284                       |
| Amino acids         | Alanine              | <u><b>1.51</b></u> (d, $\beta$ CH <sub>3</sub> ); 3.76 (q, $\alpha$ CH)                                                                              | FDB000556/<br>HMDB0000161                       |
|                     | Arginine             | 1.75 (m, $\gamma$ CH <sub>2</sub> ); 1.96 (m, $\beta$ CH <sub>2</sub> ); <u><b>3.27</b></u> (t, $\delta$ CH <sub>2</sub> ); 3.83 (t, $\alpha$ CH)    | FDB002257/<br>HMDB0000517                       |
|                     | Isoleucine           | <b>0.93</b> (t, $\delta$ CH <sub>3</sub> ); 1.00 (d, $\beta'$ CH <sub>3</sub> ); 1.47 (m, $\gamma'$ CH); 1.99 (m, $\beta$ CH); 3.67 (d, $\alpha$ CH) | FDB012397/<br>HMDB0000172                       |

|                   |                       |                                                                                                                                                               |                           |
|-------------------|-----------------------|---------------------------------------------------------------------------------------------------------------------------------------------------------------|---------------------------|
|                   | Leucine               | <b>0.95</b> (t, $\delta$ , $\delta'$ CH <sub>3</sub> ); 1.71 (m, $\gamma$ CH); 1.80 (m, $\beta$ CH <sub>2</sub> ); 3.90 (t, $\alpha$ CH)                      | FDB001946/<br>HMDB0000687 |
|                   | Glutamate             | 2.11 (m, $\beta$ , $\beta'$ CH <sub>2</sub> ); <b>2.49</b> (m, $\gamma$ CH <sub>2</sub> ); 3.86 (t, $\alpha$ CH)                                              | FDB012535/<br>HMDB0000148 |
|                   | Histidine             | 3.37 (dd, $\beta$ , $\beta'$ CH <sub>2</sub> ); 4.12 (dd, $\alpha$ CH); 7.39 (s, C4H ring); <b>8.65</b> (s, C2H ring)                                         | FDB011856/<br>HMDB0000177 |
|                   | Proline               | <b>2.02</b> (m, $\gamma$ CH <sub>2</sub> ); 2.11 (m, $\beta'$ CH); 2.34 (m, $\beta$ CH); 3.35 (t, $\delta'$ CH); 3.41 (t, $\delta$ CH); 4.23 (t, $\alpha$ CH) | FDB000570/<br>HMDB0000162 |
|                   | Phenylalanine         | 7.32 (m, C2H/ C6H ring); <b>7.40</b> (m, C4H ring); 7.43 (m, C3H/ C5H ring);                                                                                  | FDB004940/<br>HMDB0000159 |
|                   | Tyrosine              | <b>6.86</b> (d, C3H/ C5H ring); 7.17 (d, C2H/ C6H ring)                                                                                                       | FDB000446/<br>HMDB0000158 |
|                   | Valine                | <b>0.99</b> (d, $\gamma$ CH <sub>3</sub> ); 1.04 (d, $\gamma'$ CH <sub>3</sub> ); 1.04 (m, $\beta$ CH); 1.04 (d, $\alpha$ CH)                                 | FDB012740/<br>HMDB0000883 |
| Sugars            | $\alpha$ -glucose     | <b>5.22</b> (d, $\alpha$ C1H)                                                                                                                                 | FDB011829/<br>HMDB0003345 |
|                   | $\beta$ -glucose      | <b>4.65</b> (d, $\beta$ C1H)                                                                                                                                  | FDB011824<br>HMDB0003345  |
|                   | Fructose              | <b>3.86</b> (m, 2CH <sub>2</sub> ), 4.02 (d, CH <sub>2</sub> ); 4.09 (d, CH <sub>2</sub> )                                                                    | FDB012528/<br>HMDB0000660 |
|                   | Turanose <sup>3</sup> | <b>5.30</b> (d)                                                                                                                                               | FDB002107/<br>HMDB0011740 |
| Other metabolites | Acetoin               | <b>1.36</b> (d, CH <sub>3</sub> ); 2.21 (s, CH <sub>3</sub> ); 4.41 (q, CH)                                                                                   | FDB011799/<br>HMDB0003243 |
|                   | Acetaldehyde          | 2.23 (d, CH <sub>3</sub> ); <b>9.66</b> (q, CH)                                                                                                               | FDB008297/<br>HMDB0000990 |
|                   | Ethyl acetate         | 1.24 (t, CH <sub>3</sub> ); <b>2.06</b> (s, CH <sub>3</sub> ); 4.12 (q, OCH <sub>2</sub> )                                                                    | FDB003240/<br>HMDB0031217 |
|                   | 5-HMF                 | 4.70 (s, CH <sub>2</sub> ); 6.67 (d, C2H, ring); <b>9.45</b> (s, C3H, ring)                                                                                   | FDB012717/<br>HMDB0034355 |
|                   | Choline               | <b>3.18</b> (s, N(CH <sub>3</sub> ) <sub>3</sub> ); 4.07 (m, CH <sub>2</sub> OH)                                                                              | FDB000710/<br>HMDB0000097 |
|                   | Uridine               | 4.23 (t, C3'H ribose); 4.38 (t, C2'H ribose); 5.90 (d, C5H ring); 5.94 (d, C1'H ring); <b>7.87</b> (d, C6H)                                                   | FDB007411/<br>HMDB0000296 |
|                   | Trigonelline          | 4.43 (s, CH); 8.09 (t, CH <sub>2</sub> ); <b>8.83</b> (d, 2CH), 9.15 (s, CH)                                                                                  | FDB002237/<br>HMDB0000875 |

**Table S2.** Summary of results obtained by one- and two-dimensional statistical total correlation spectroscopy analysis (1D and 2D STOCSY) [30]. Only metabolites or unassigned resonances with correlations  $|r| \geq 0.9$  and  $p < 0.001$  were considered. <sup>a</sup> tentative spin system 1 (U13, U15 and U19); <sup>b</sup> tentative spin system 2 (U23, U27 and U33); <sup>c</sup> tentative spin system 3 (U1, U41 and U43). Abbreviations: s, singlet; d, doublet;  $U_i$ : unassigned resonance  $i$ . <sup>#</sup> Acetate results are possibly affected by residual amounts present in the films (use of acetic acid the films preparation). The numbers in brackets correspond to inter-peak correlations identified in Figure S1. For unassigned resonances U7, U13 and U23, inter-peak correlations were identified by 1D STOCSY (not shown).

| Metabolites                   | Chemical shift/<br>ppm<br>(multiplicity) | Positive correlations<br>( $r > 0.90$ )                                | Negative correlations<br>( $r > 0.90$ )                  |
|-------------------------------|------------------------------------------|------------------------------------------------------------------------|----------------------------------------------------------|
| <b>Identified metabolites</b> |                                          |                                                                        |                                                          |
| Acetate <sup>#</sup>          | 2.07 (s)                                 | Lactate (2)                                                            | Citrate (18); malate (19)                                |
| Citrate                       | 2.93 (d)                                 | Fumarate (36); malate (24);<br>uridine (34)                            | Acetate (18); lactate (4);<br>alanine (16); acetoin (22) |
| Fumarate                      | 6.74 (s)                                 | Citrate (36); malate (37); uridine<br>(48)                             | lactate (8)                                              |
| Lactate                       | 1.41 (d)                                 | Acetate (2); alanine (1); acetoin<br>(3)                               | Citrate (4); fumarate (8);<br>malate (5); uridine (7)    |
| Malate                        | 2.80 (dd)                                | Citrate (24); fumarate (37);<br>uridine (35)                           | Acetate (19); lactate (5);<br>alanine (17); acetoin (23) |
| Alanine                       | 1.51 (d)                                 | lactate (1); acetoin (15)                                              | Citrate (16); malate (17)                                |
| Acetoin                       | 1.36 (s)                                 | Lactate (3); alanine (15)                                              | Citrate (22); malate (23)                                |
| Uridine                       | 7.87 (d)                                 | Citrate (34); malate (35); fumarate<br>(48)                            | Lactate (7)                                              |
| <b>Unassigned resonances</b>  |                                          |                                                                        |                                                          |
| U1 <sup>c</sup>               | 1.46 (d)                                 | Citrate (10); malate (11); sugar<br>(14); ferulate; U41 (12); U43 (13) | Acetate (9)                                              |
| U7                            | 3.01 (s)                                 | citrate; malate; uridine; U12                                          | lactate                                                  |
| U12                           | 4.18 (s)                                 | Citrate (28); malate (29); uridine<br>(43); U7                         | Lactate (40); U13 (41); U19<br>(42)                      |
| U13 <sup>a</sup>              | 4.20 (d)                                 | lactate (7); U15; U19 (44)                                             | Citrate (30); malate (31);<br>uridine (45); U12 (41)     |
| U15 <sup>a</sup>              | 4.37 (d)                                 | lactate; U13; U19                                                      | citrate; malate                                          |
| U19 <sup>a</sup>              | 5.78 (d)                                 | Lactate (46); U13 (44); U15                                            | Citrate (32); malate (33);<br>uridine (47); U12 (42)     |
| U23 <sup>b</sup>              | 6.61 (d)                                 | U27; U33                                                               | ferulate                                                 |
| U27 <sup>b</sup>              | 7.91 (s)                                 | U23; U33 (51)                                                          | Ferulate (49)                                            |
| U33 <sup>b</sup>              | 9.49 (s)                                 | U23; U27 (51)                                                          | Ferulate (50)                                            |
| U41 <sup>c</sup>              | 3.20 (d)                                 | Sugar (38); U1 (12); U43 (27)                                          | Acetate (20)                                             |
| U43 <sup>c</sup>              | 3.37 (d)                                 | Citrate (25); malate (26); sugar<br>(39); U1 (13); U41 (27)            | Acetate (21); lactate (6)                                |

**Figure S1.** 2D STOCYSY contour plots obtained for (a) whole NMR spectra of all wines and expansions of (b) 3.0 - 6.0 ppm and (c) 0.5 - 3.8 ppm regions. Positive and negative correlations are represented in red and in blue, respectively. Only resonances correlations with  $|r| \geq 0.90$  and  $p < 0.001$  were considered. Each peak in the NMR spectra will appear on the diagonal of the correlation matrix, with an autocorrelation value of 1. The inter-peak correlations above the threshold value appear off the diagonal. Some inter-peak correlations are identified by numbers and detailed in Table S2.

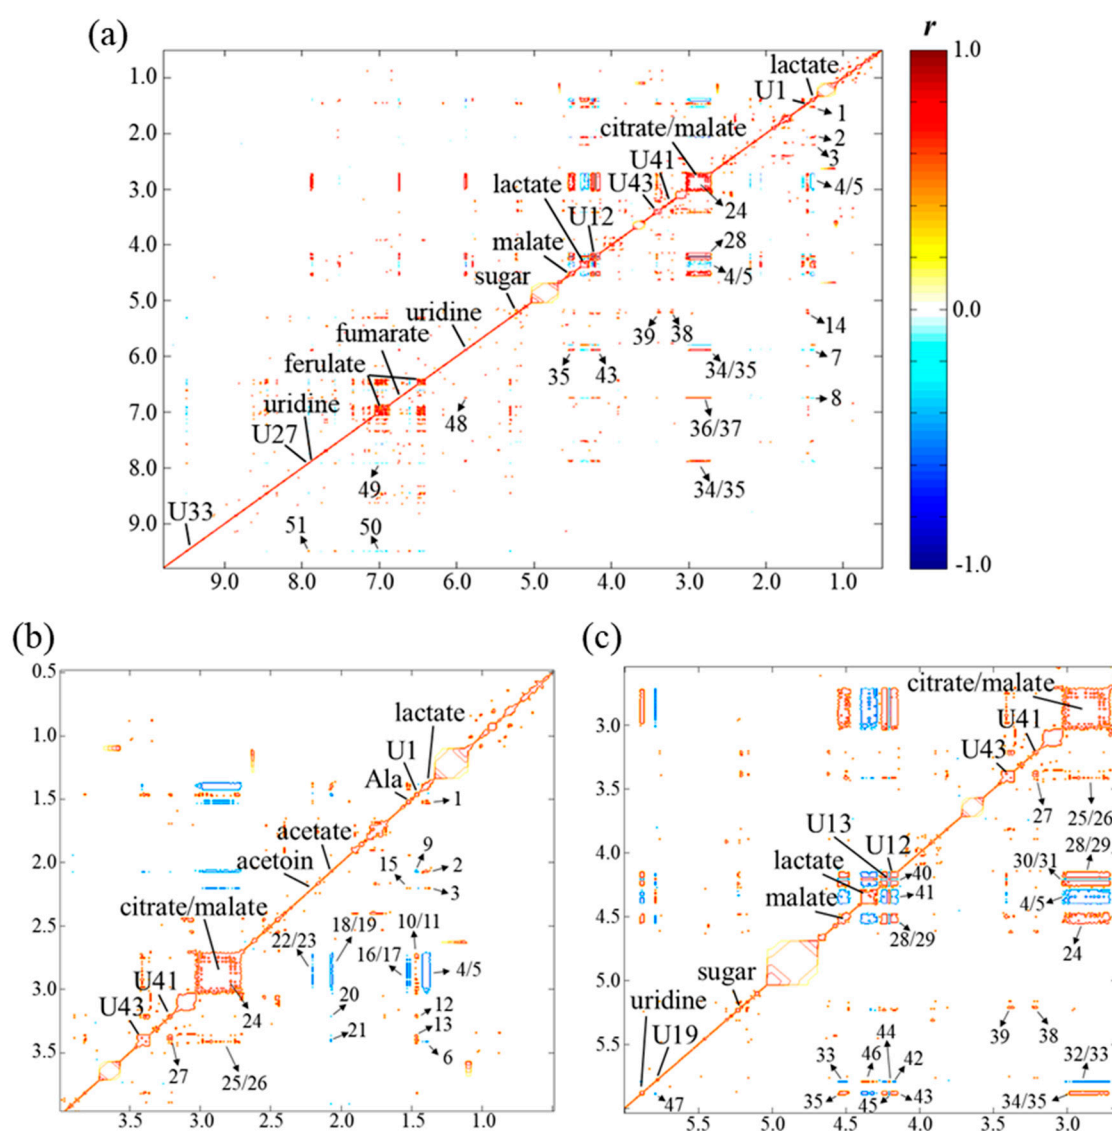

**Figure S2.** Boxplots of varying unassigned resonances in white wines in the following conditions: untreated (Unt), treated with 40 mg/L SO<sub>2</sub>, and treated with 25 cm<sup>2</sup> and 100 cm<sup>2</sup> Ch-Ge films, Chit25 and Chit100, respectively. *U<sub>i</sub>*: unassigned resonance *i*. Based on STOCSY results (Figure S1 and Table S2): <sup>a</sup> tentative spin system 1 (unassigned U13, U15 and U19); <sup>b</sup> tentative spin system 2 (unassigned U23, U27 and U33 probably a precursor/byproduct of ferulate); and <sup>c</sup> tentative spin system 3 (unassigned U1, U41 and U43, probably corresponding to a sugar) are suggested.

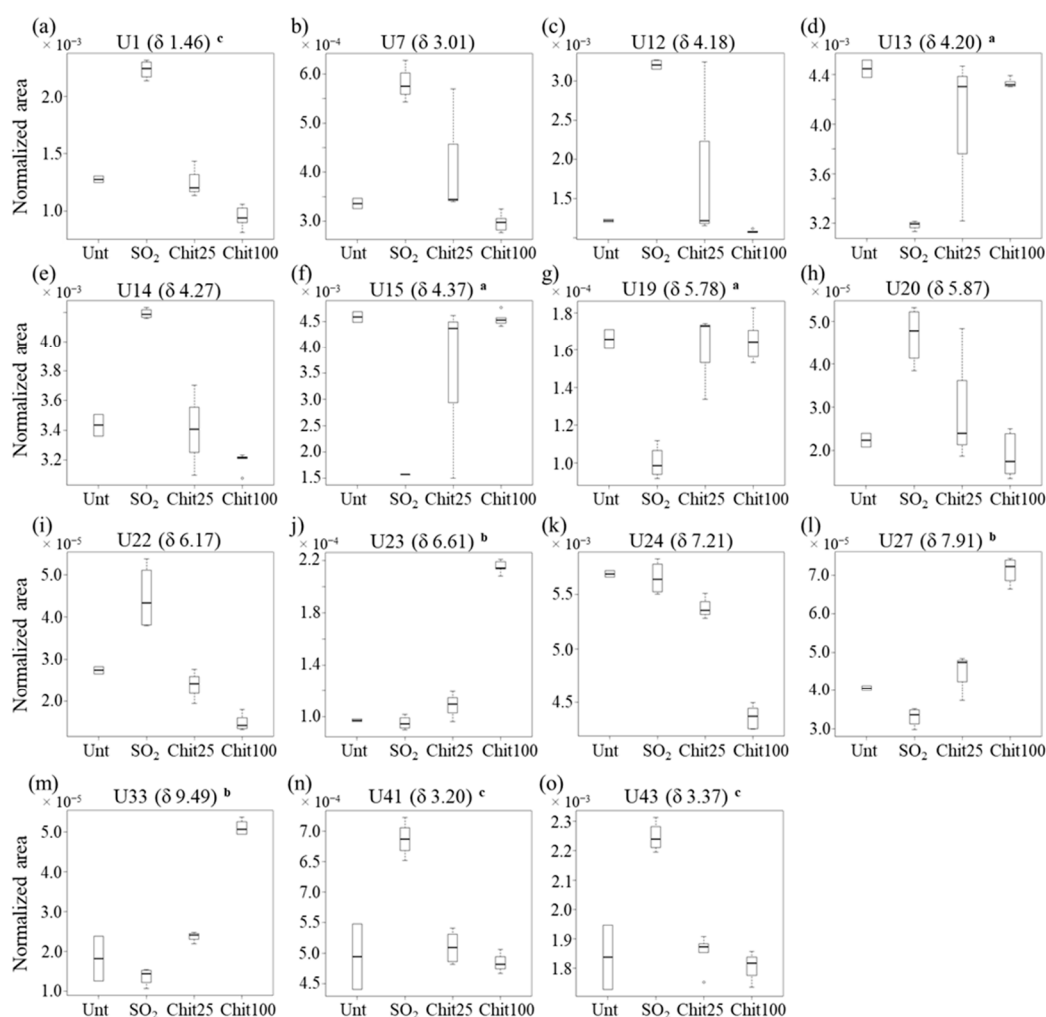

Supplement: s1 [file s1]
